# Supplementary material for: Associations between empirically derived dietary patterns and cardiovascular risk factors among older adult men
Source: Atypon-hosted journal article supplement (doi:10.1024/0300-9831/a000725), 2021-09-24
Supplement: 0300-9831_a000725_esm1.pdf [file 0300-9831_a000725_esm1.pdf]

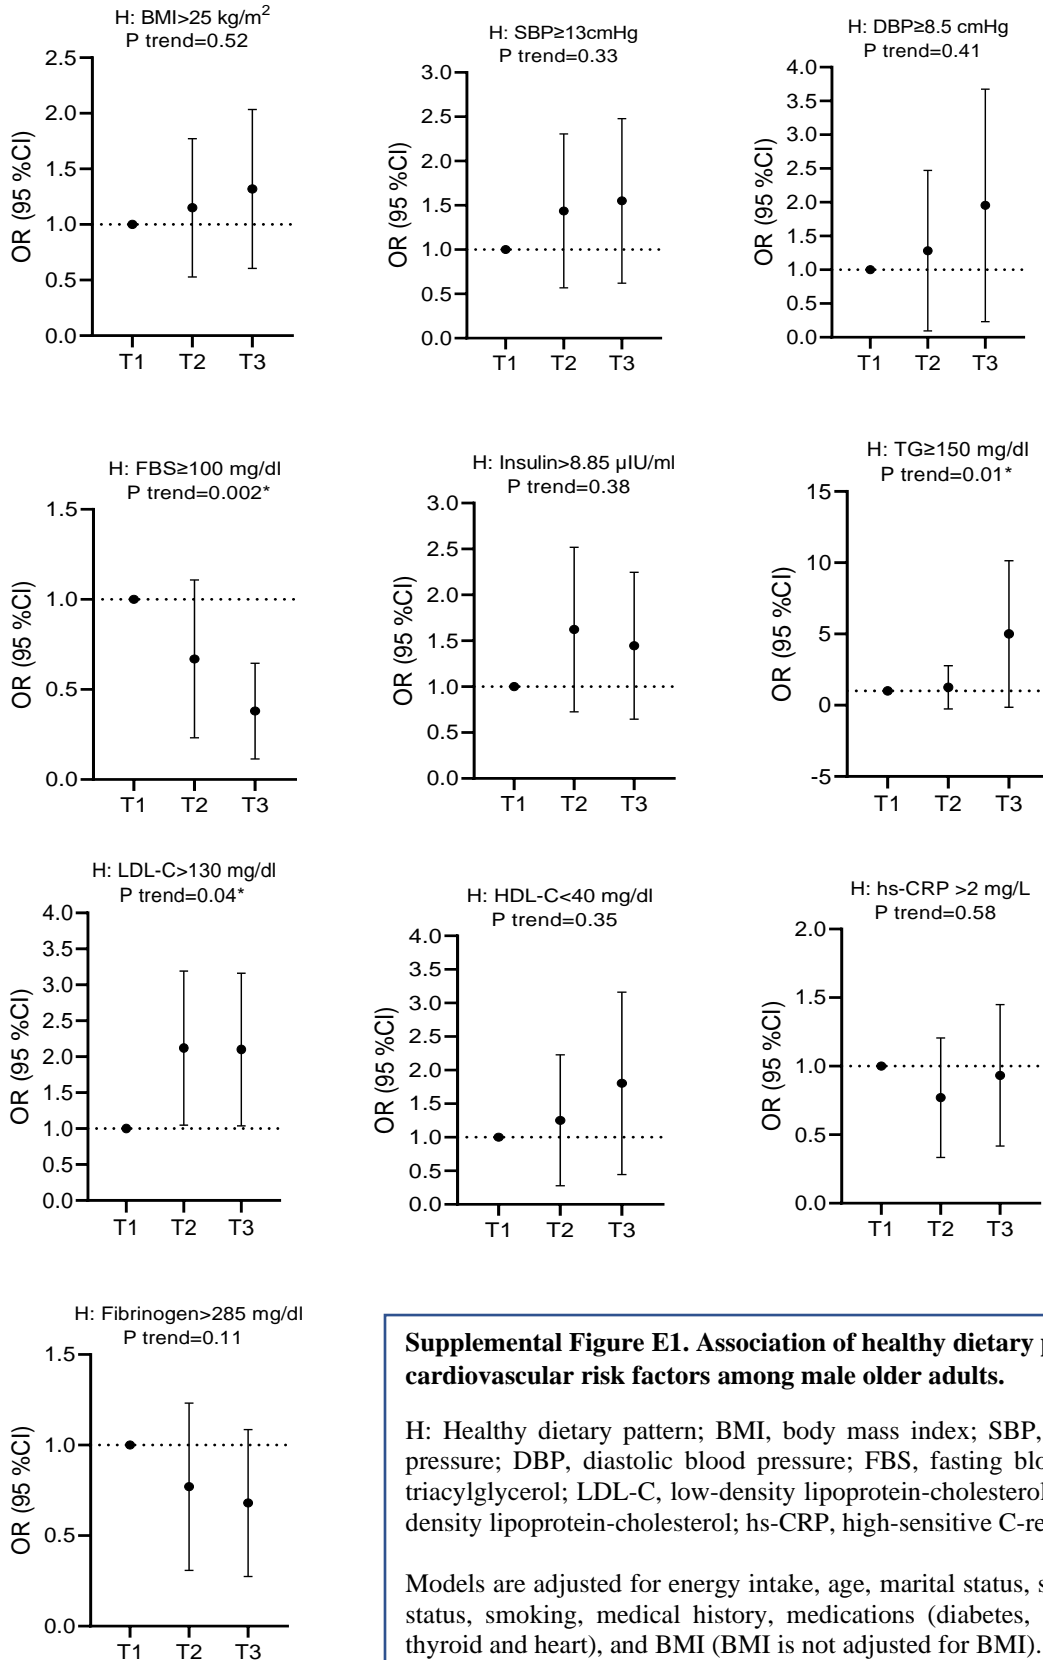

**Supplemental Figure E1. Association of healthy dietary pattern with cardiovascular risk factors among male older adults.**

H: Healthy dietary pattern; BMI, body mass index; SBP, systolic blood pressure; DBP, diastolic blood pressure; FBS, fasting blood sugar; TG; triacylglycerol; LDL-C, low-density lipoprotein-cholesterol; HDL-C, high density lipoprotein-cholesterol; hs-CRP, high-sensitive C-reactive protein.

Models are adjusted for energy intake, age, marital status, socio-economic status, smoking, medical history, medications (diabetes, lipid lowering, thyroid and heart), and BMI (BMI is not adjusted for BMI).

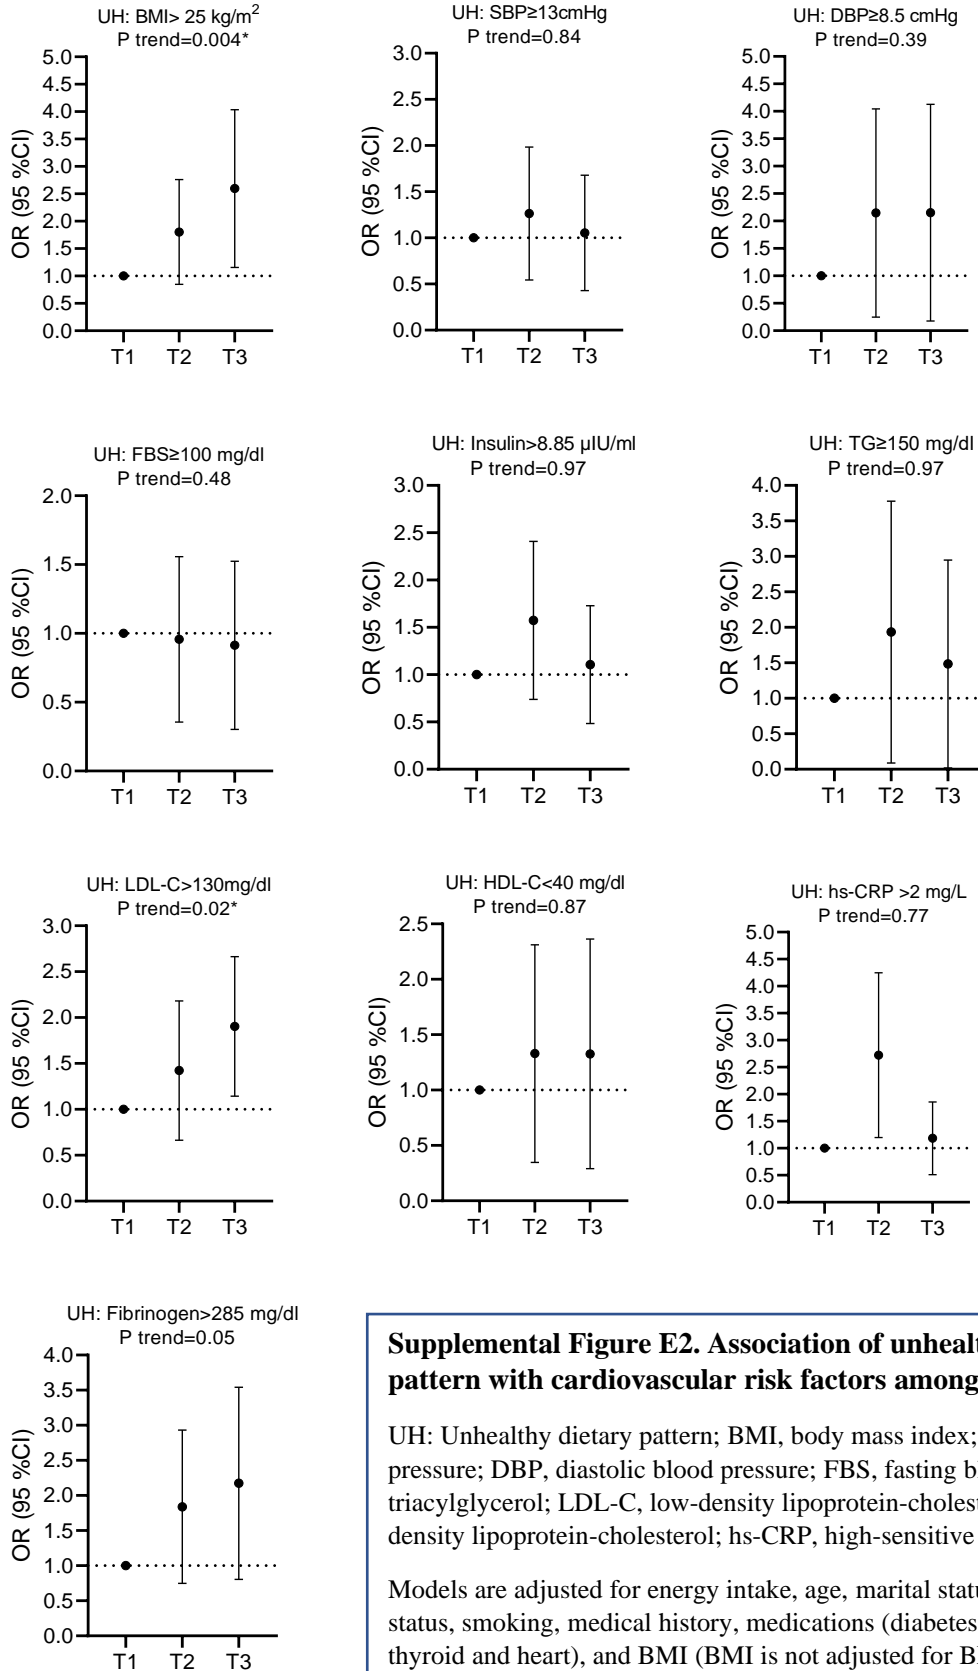

**Supplemental Figure E2. Association of unhealthy dietary pattern with cardiovascular risk factors among male older adults.**

UH: Unhealthy dietary pattern; BMI, body mass index; SBP, systolic blood pressure; DBP, diastolic blood pressure; FBS, fasting blood sugar; TG; triacylglycerol; LDL-C, low-density lipoprotein-cholesterol; HDL-C, high density lipoprotein-cholesterol; hs-CRP, high-sensitive C-reactive protein.

Models are adjusted for energy intake, age, marital status, socio-economic status, smoking, medical history, medications (diabetes, lipid lowering, thyroid and heart), and BMI (BMI is not adjusted for BMI).
